# Supplementary material
Source: PubMed Central journal article supplement (PMC5864535)
Supplement: NIHMS930376-supplement-Graphic_Asbtract.pdf [file NIHMS930376-supplement-Graphic_Asbtract.pdf]

# Platelet

mRNA  
AAAA  
Poly-A tail

Self-priming

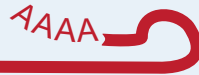

Reverse transcription  
cDNA synthesis

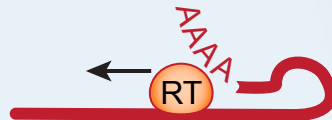

RNA-DNA  
hybrid formation

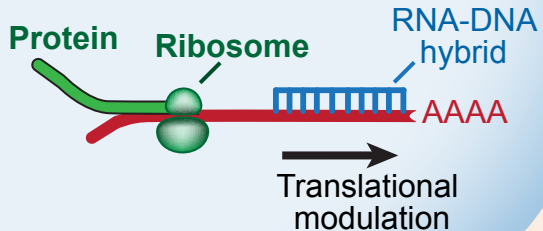

Regulation of platelet gene expression,  
integrin activation, and thrombosis
